# Supplementary material for: Use of stable isotope-labelled cells to identify active grazers of picocyanobacteria in ocean surface waters
Source: PubMed Central journal article supplement (PMC2702499; doi:10.1111/j.1462-2920.2008.01793.x), 2009-02
Supplement: emi0011-0512-SD1.pdf [file emi0011-0512-SD1.pdf]

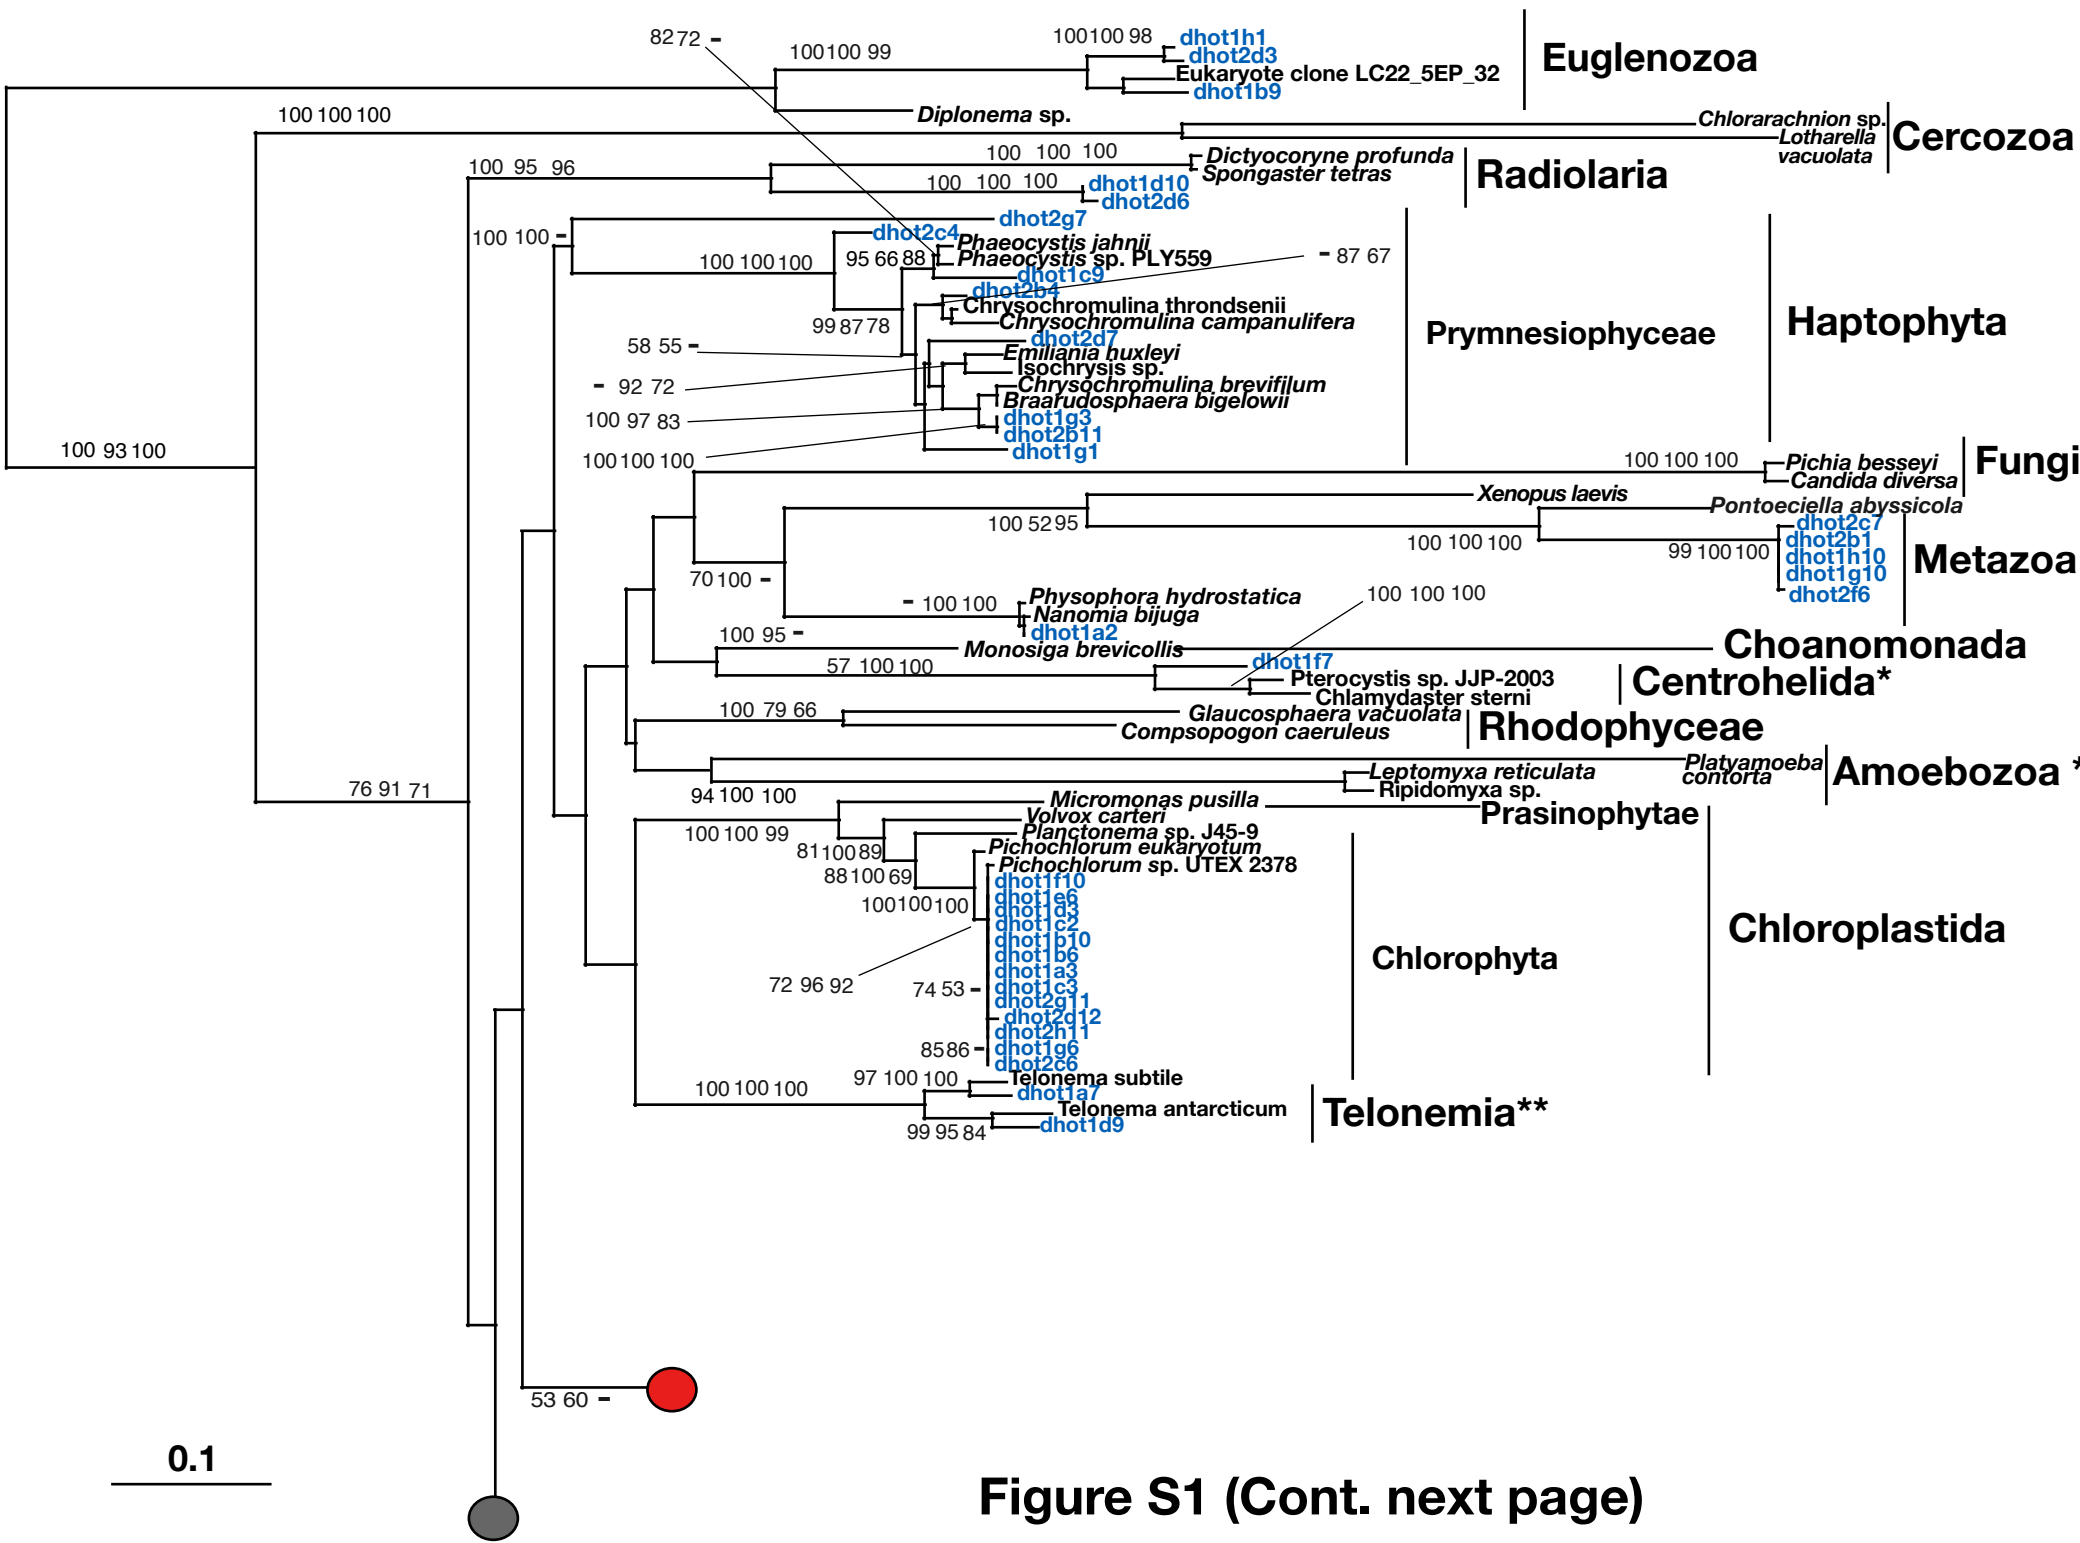

Figure S1 (Cont. next page)

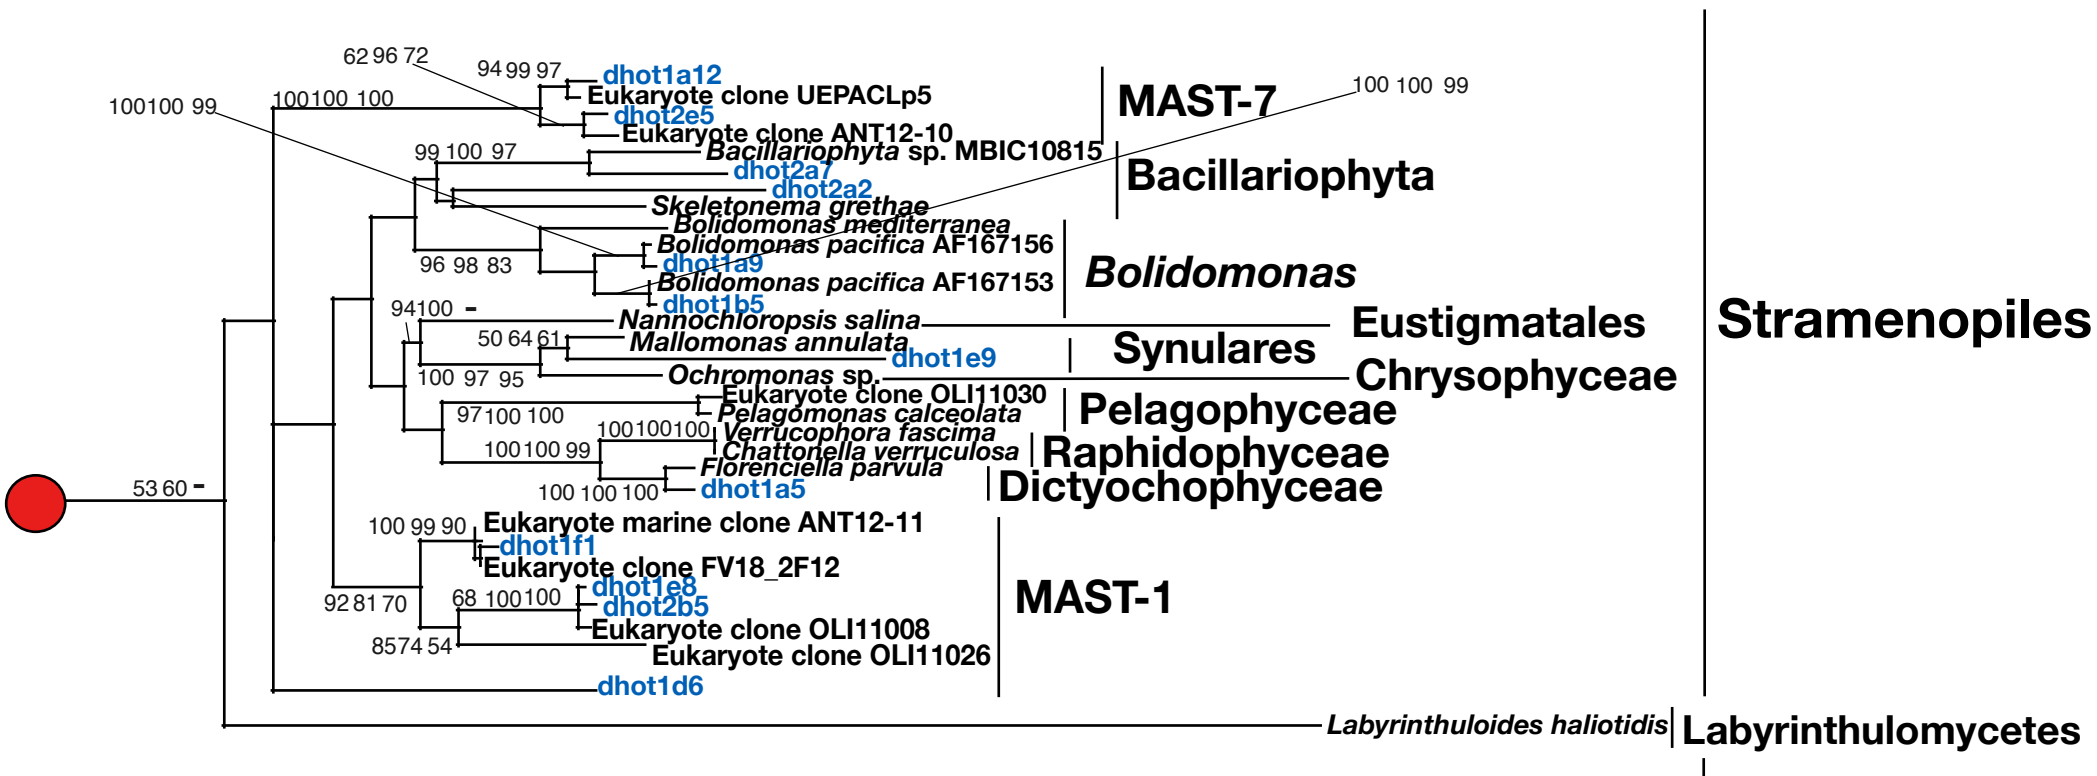

0.1

Figure S1 (Cont. next page)

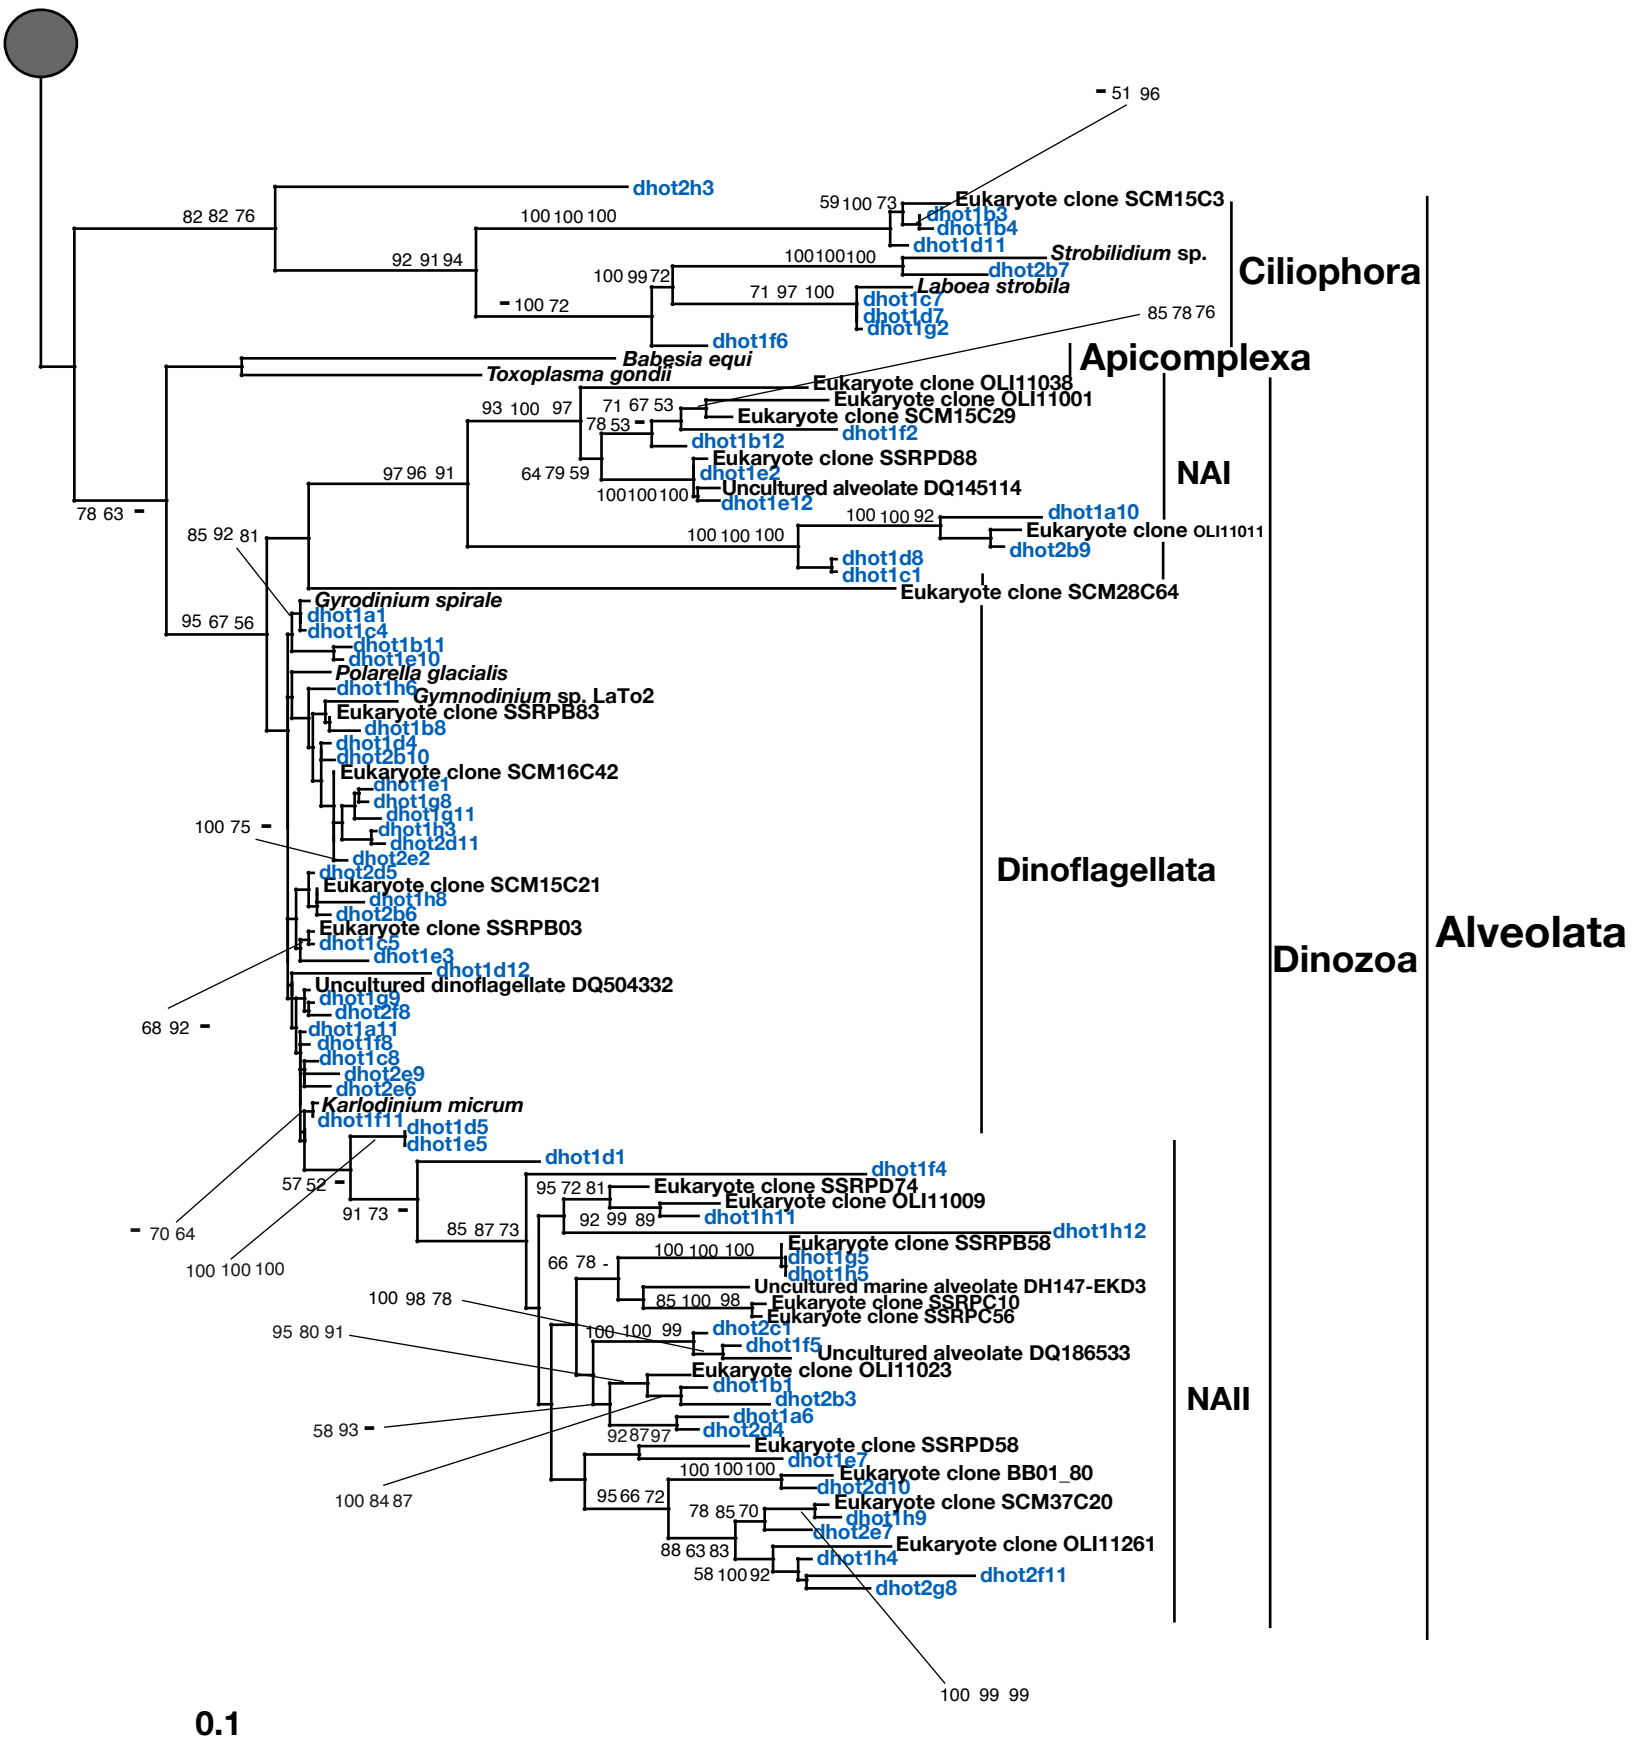

Figure S1

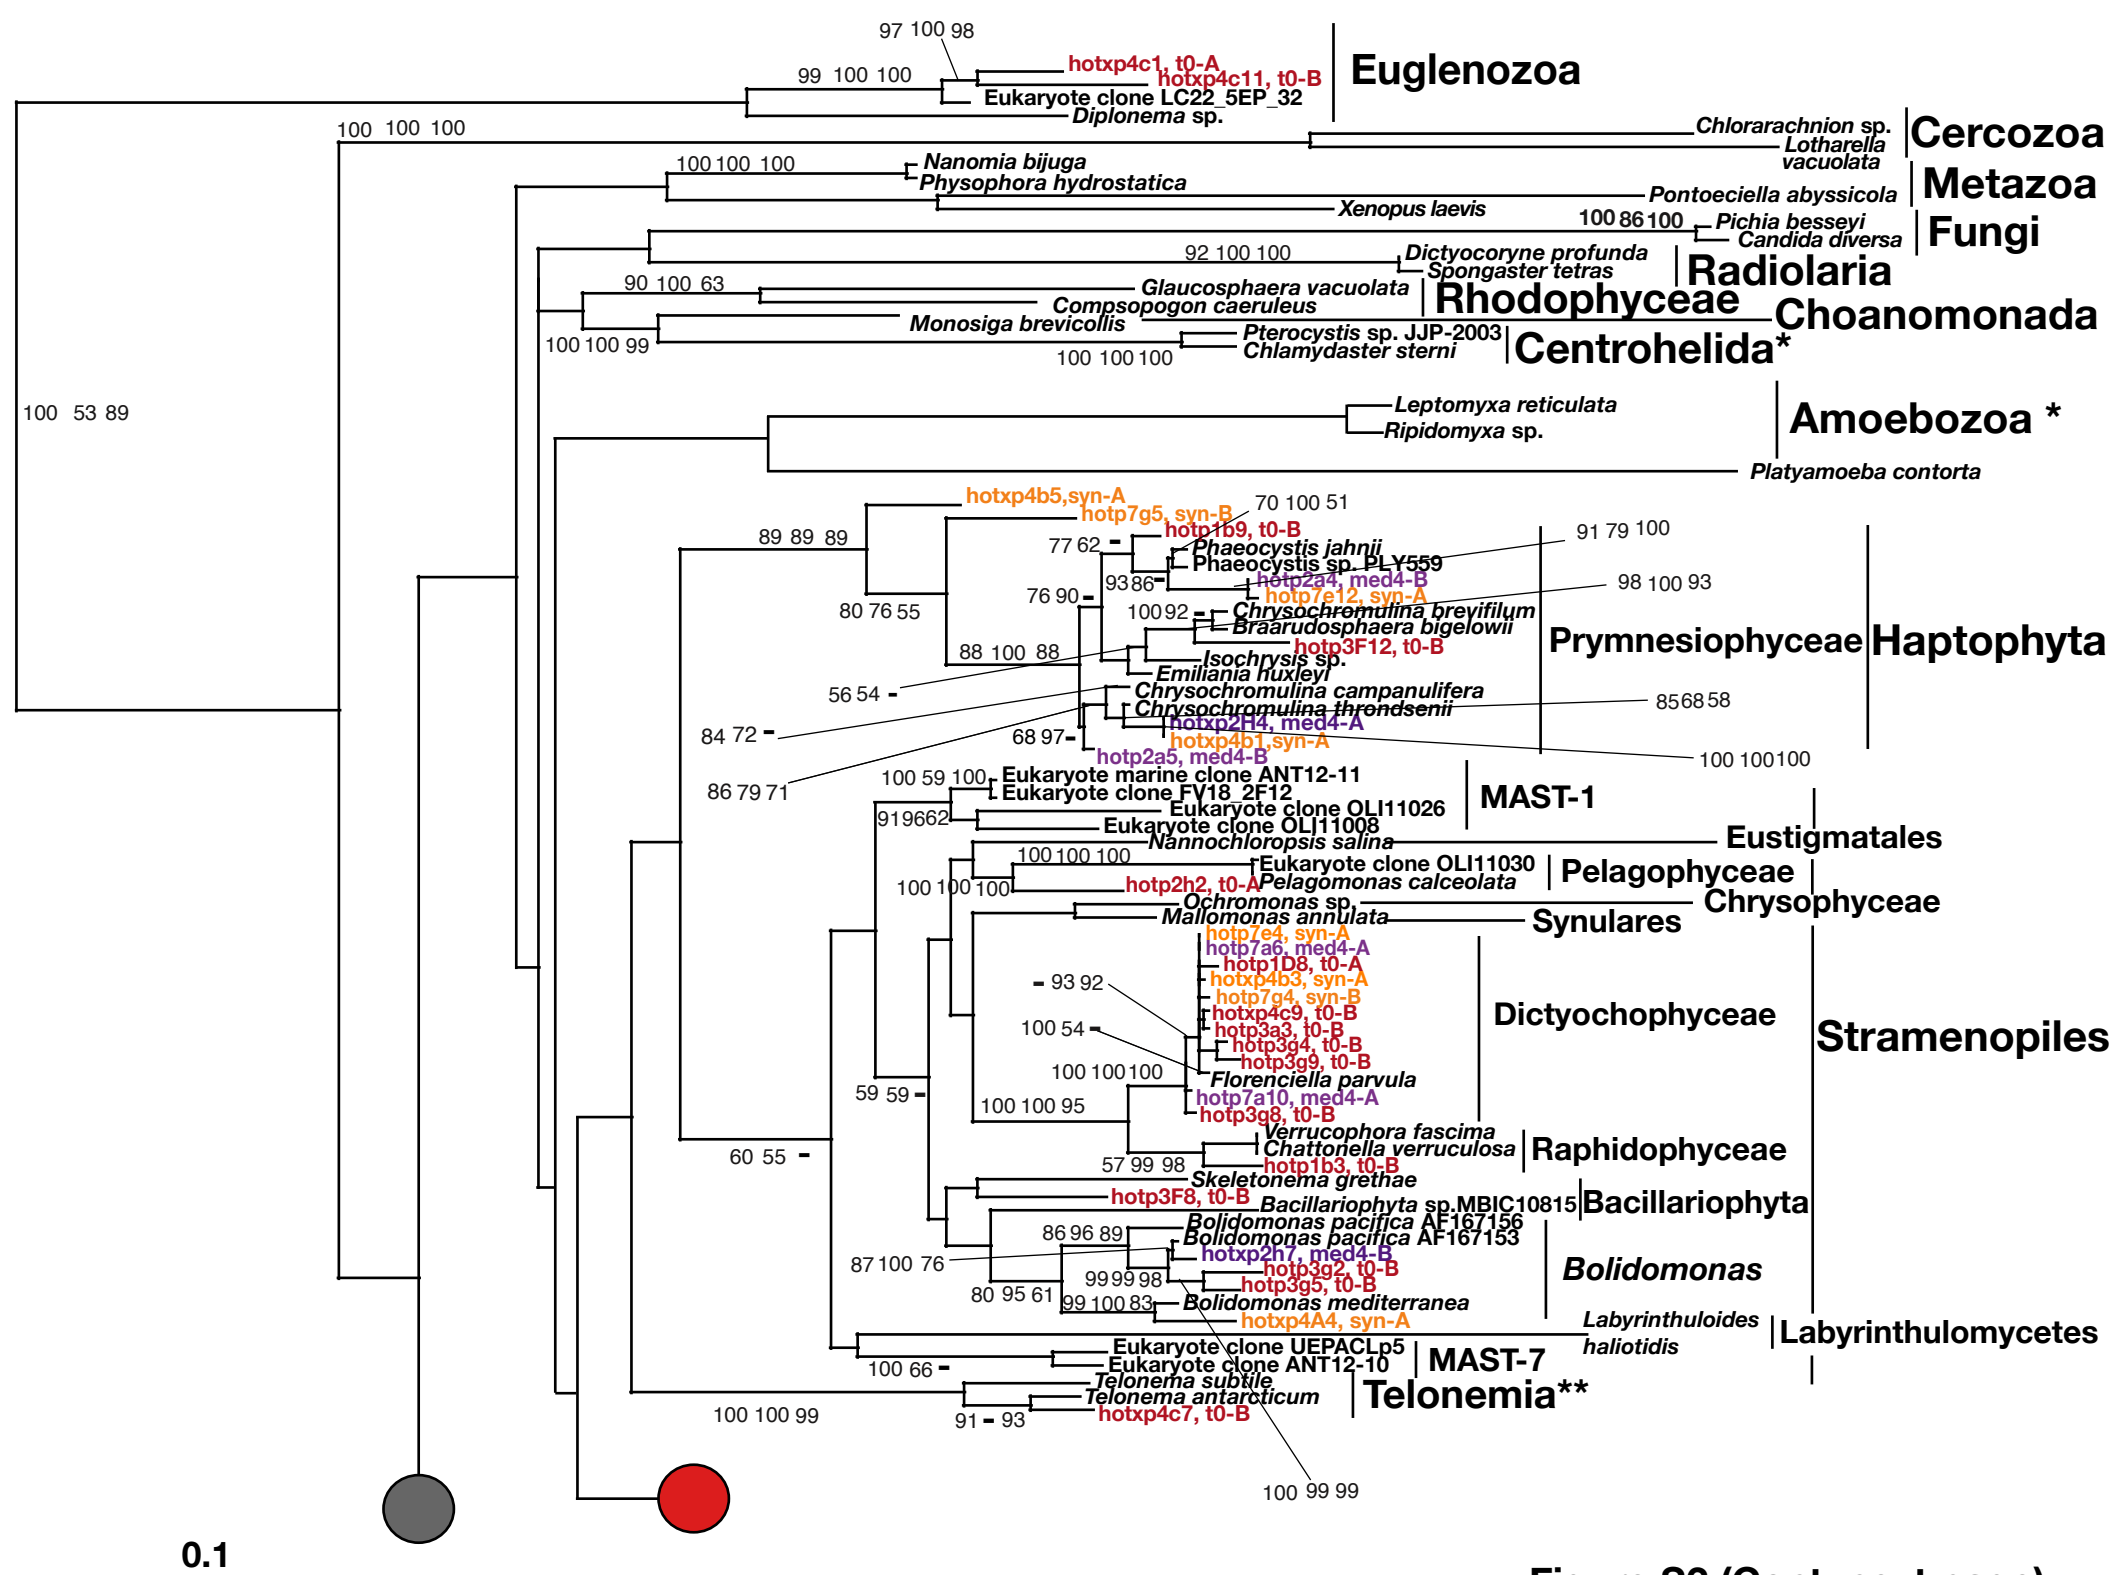

Figure S2 (Cont. next page)

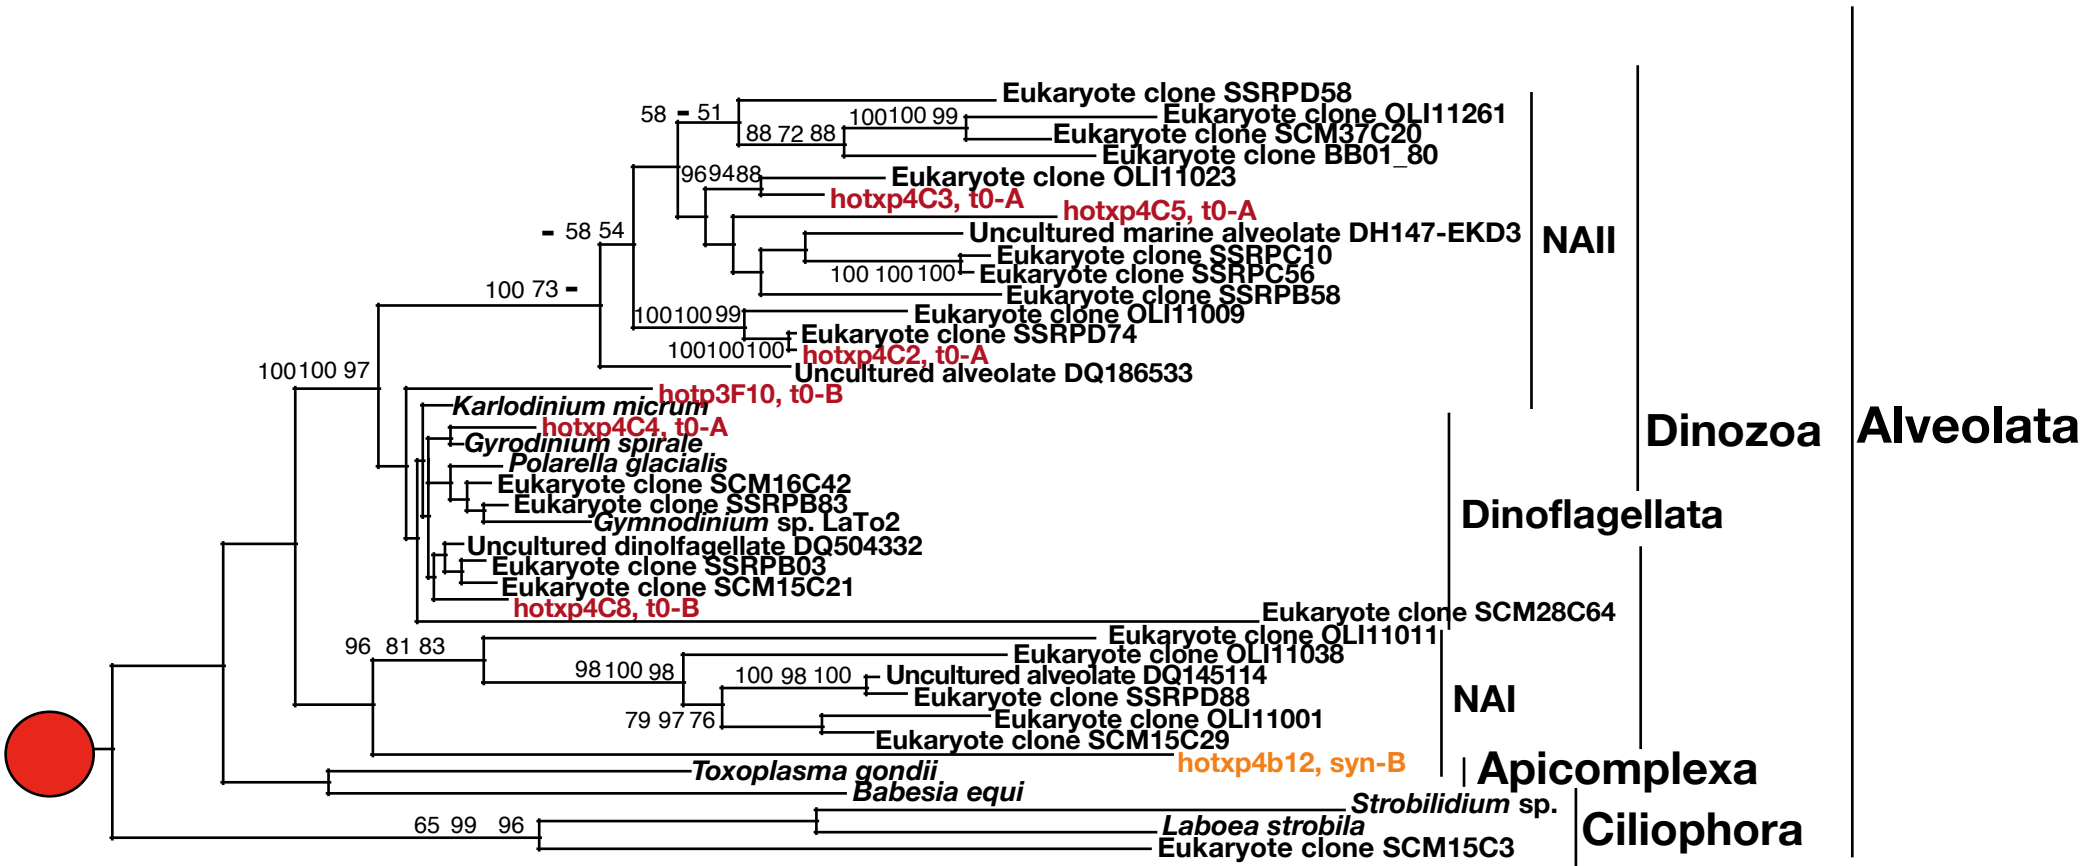

0.1

Figure S2 (Cont. next page)

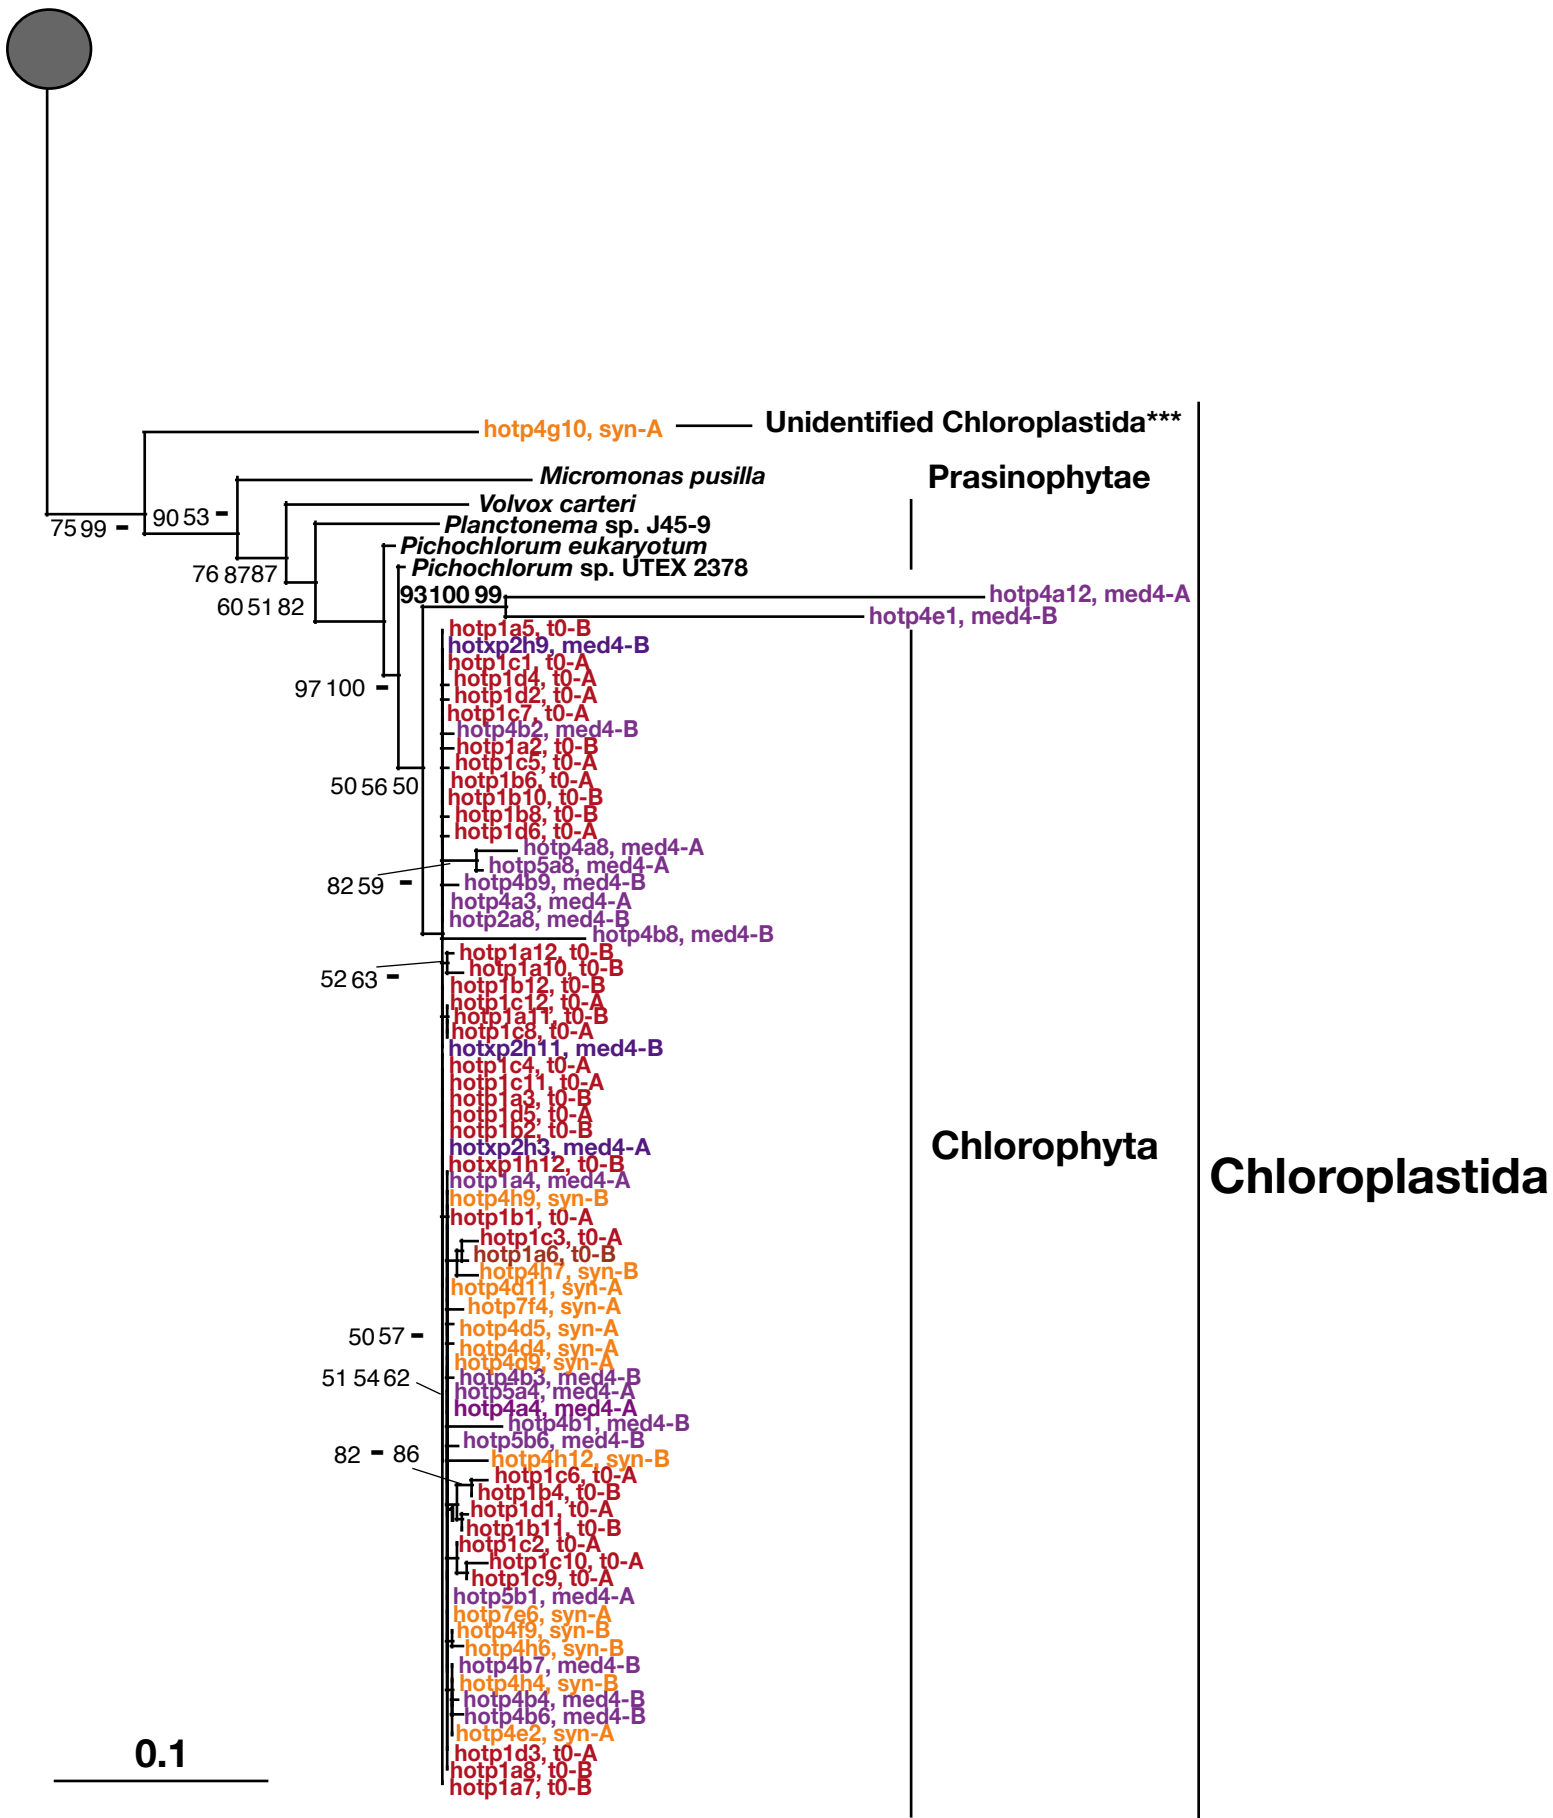

Figure S2

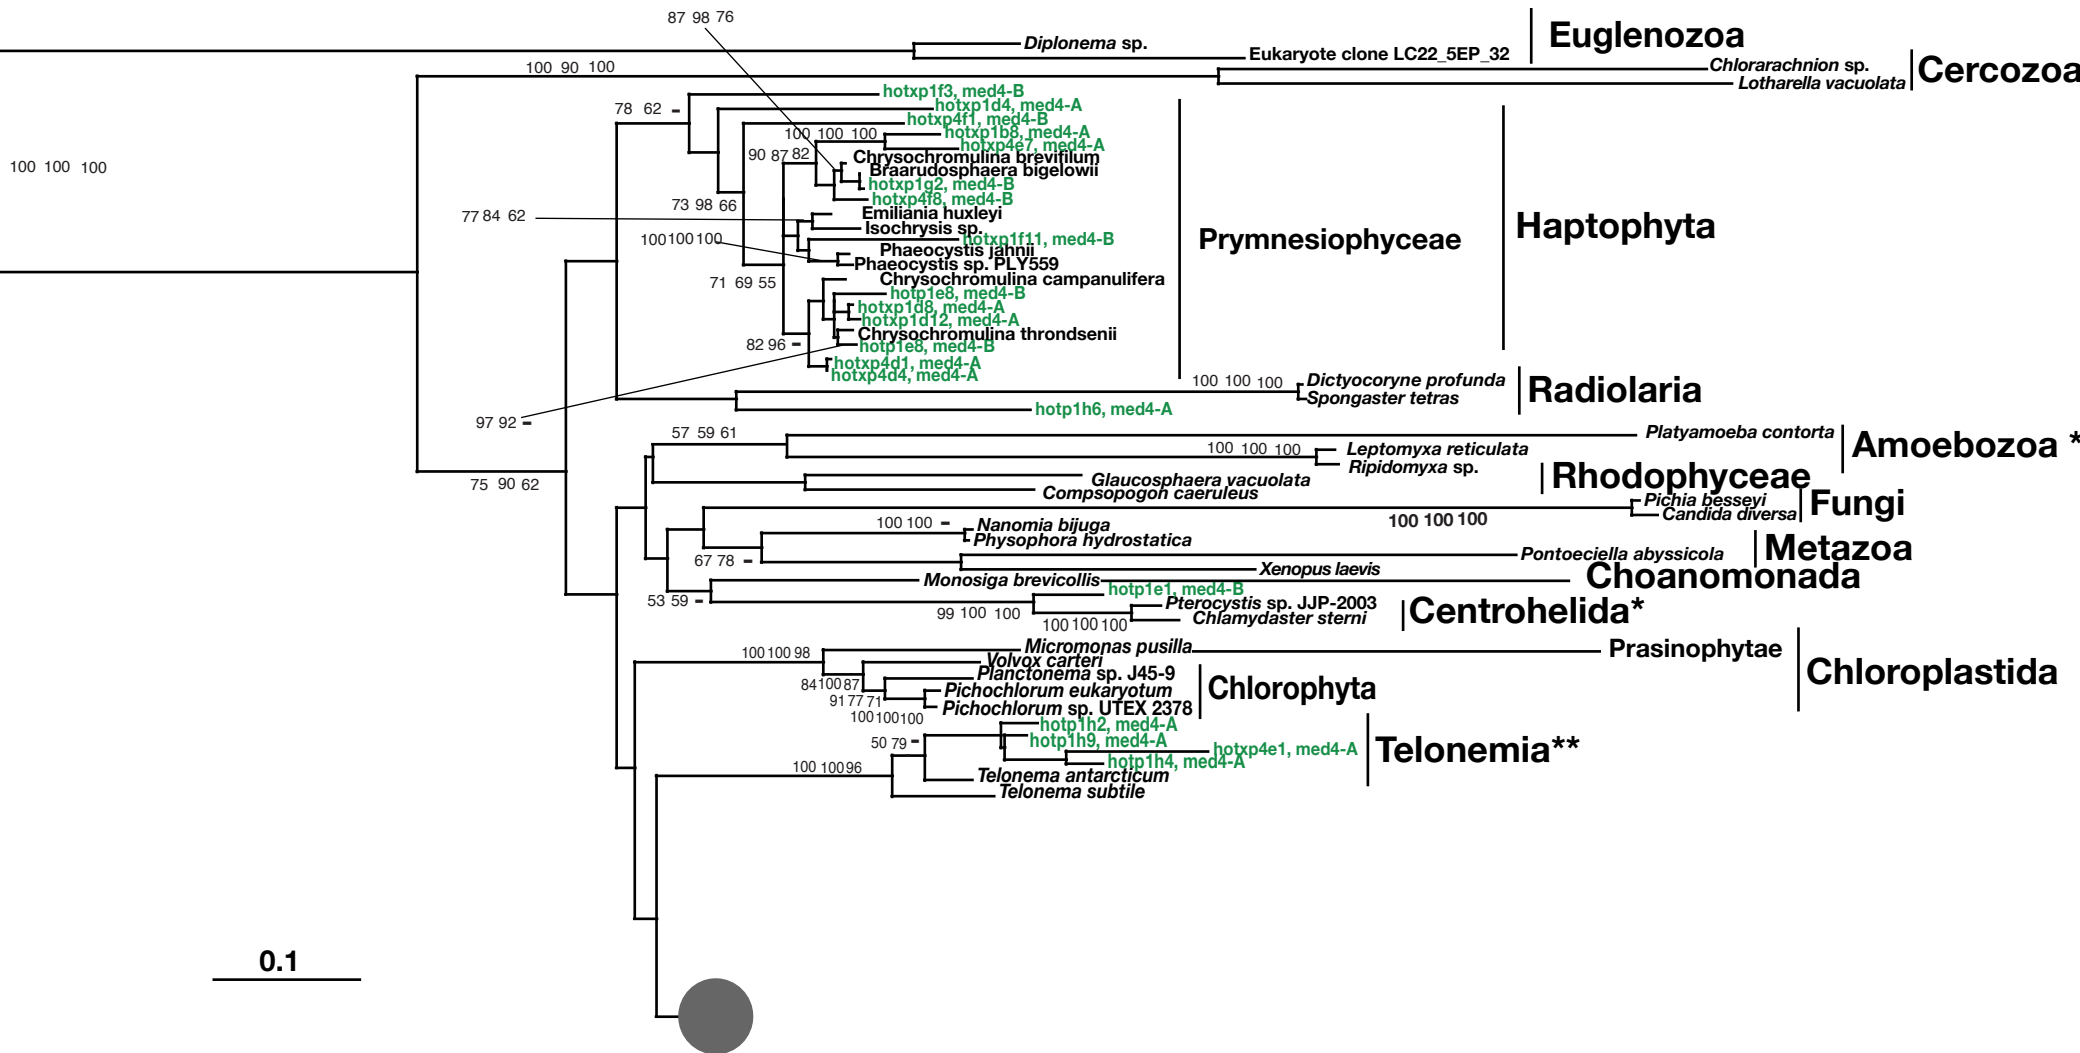

Figure S3 (Cont. next page)

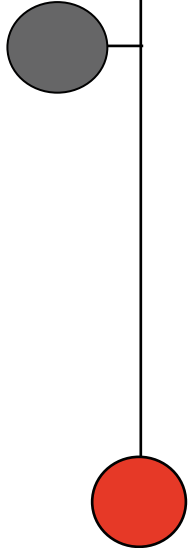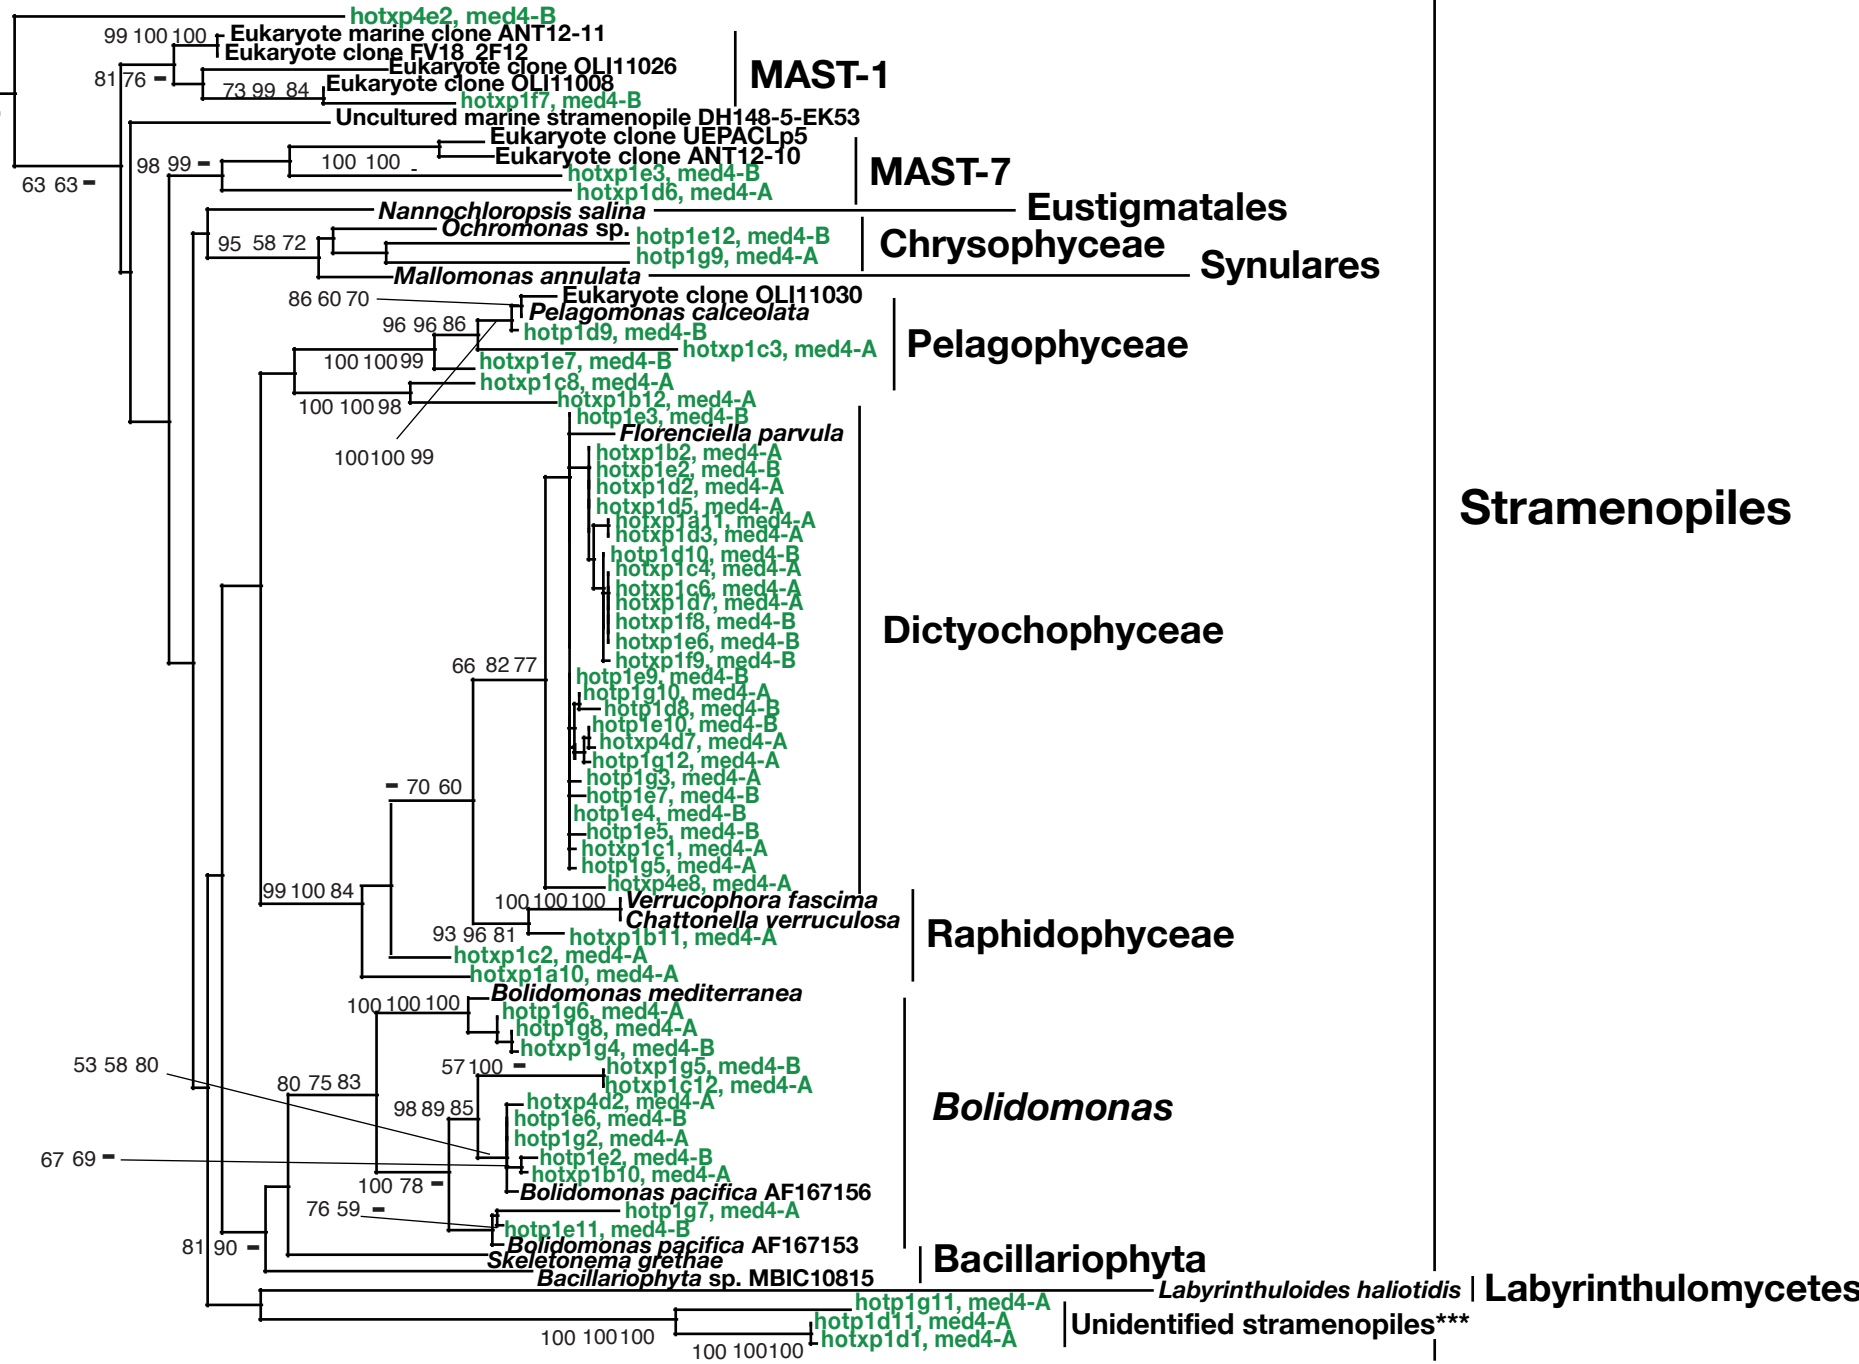

Figure S3 (Cont. next page)



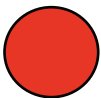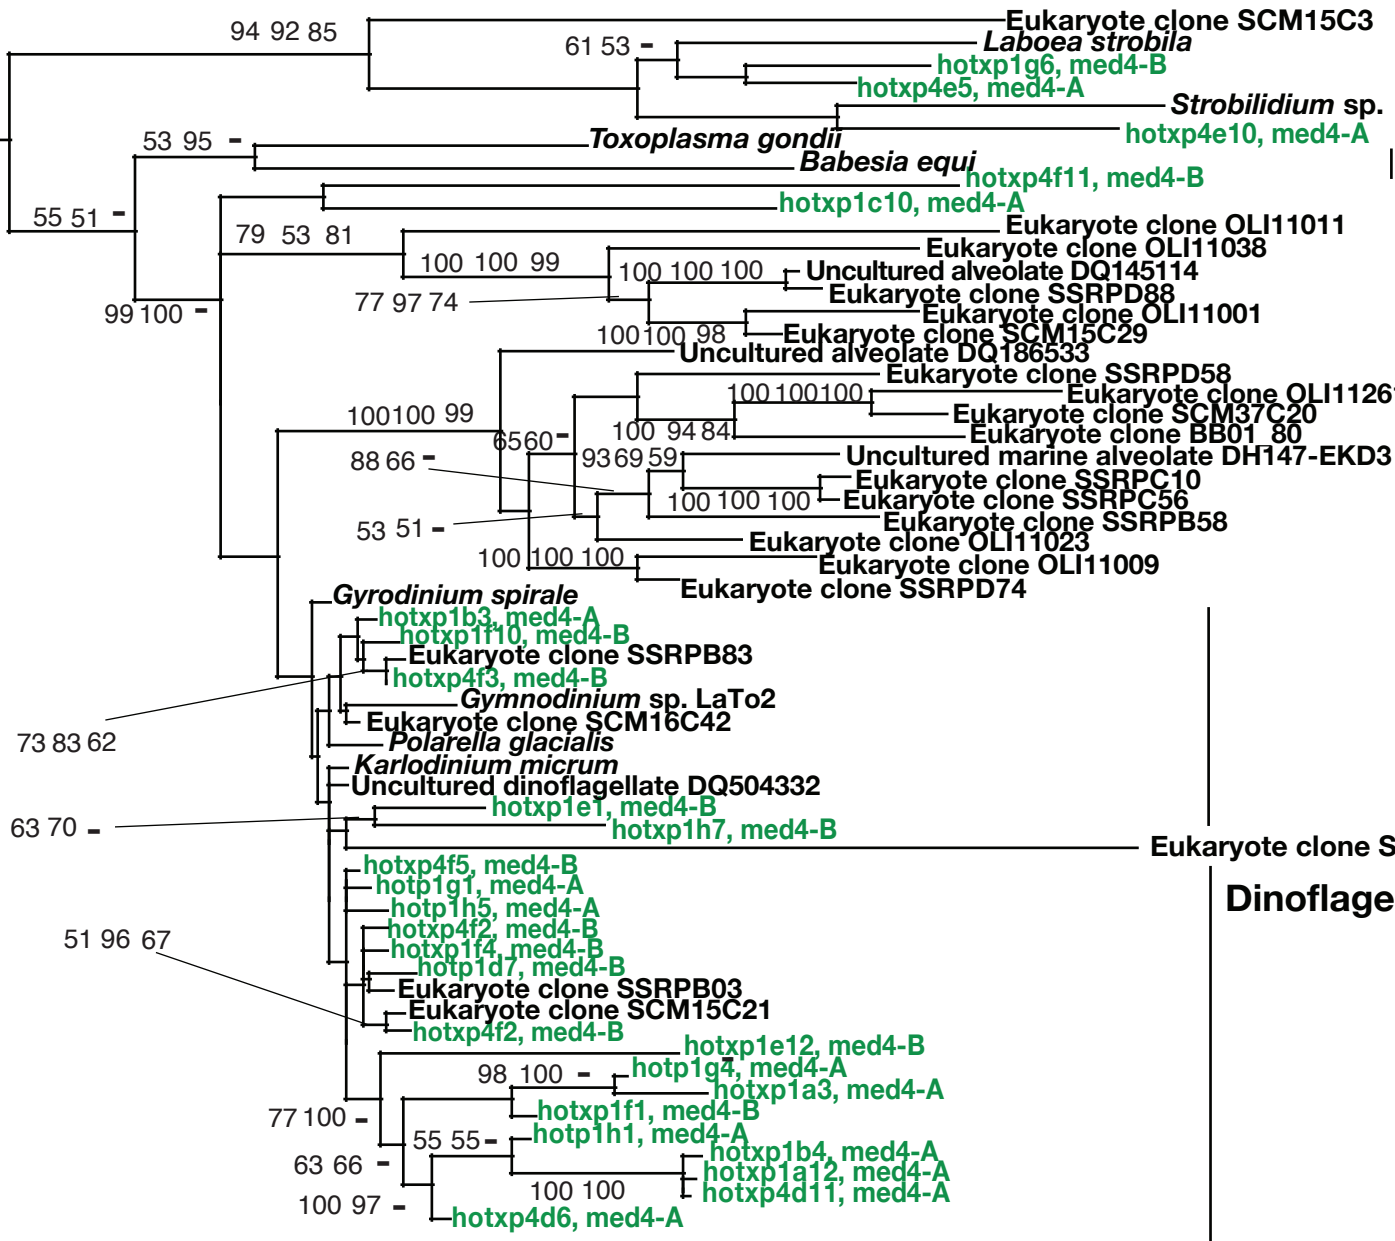

**Ciliophora**

**Apicomplexa**

**NAI**

**NAIi**

**Alveolata**

**Dinoflagellata**

0.1

Figure S3

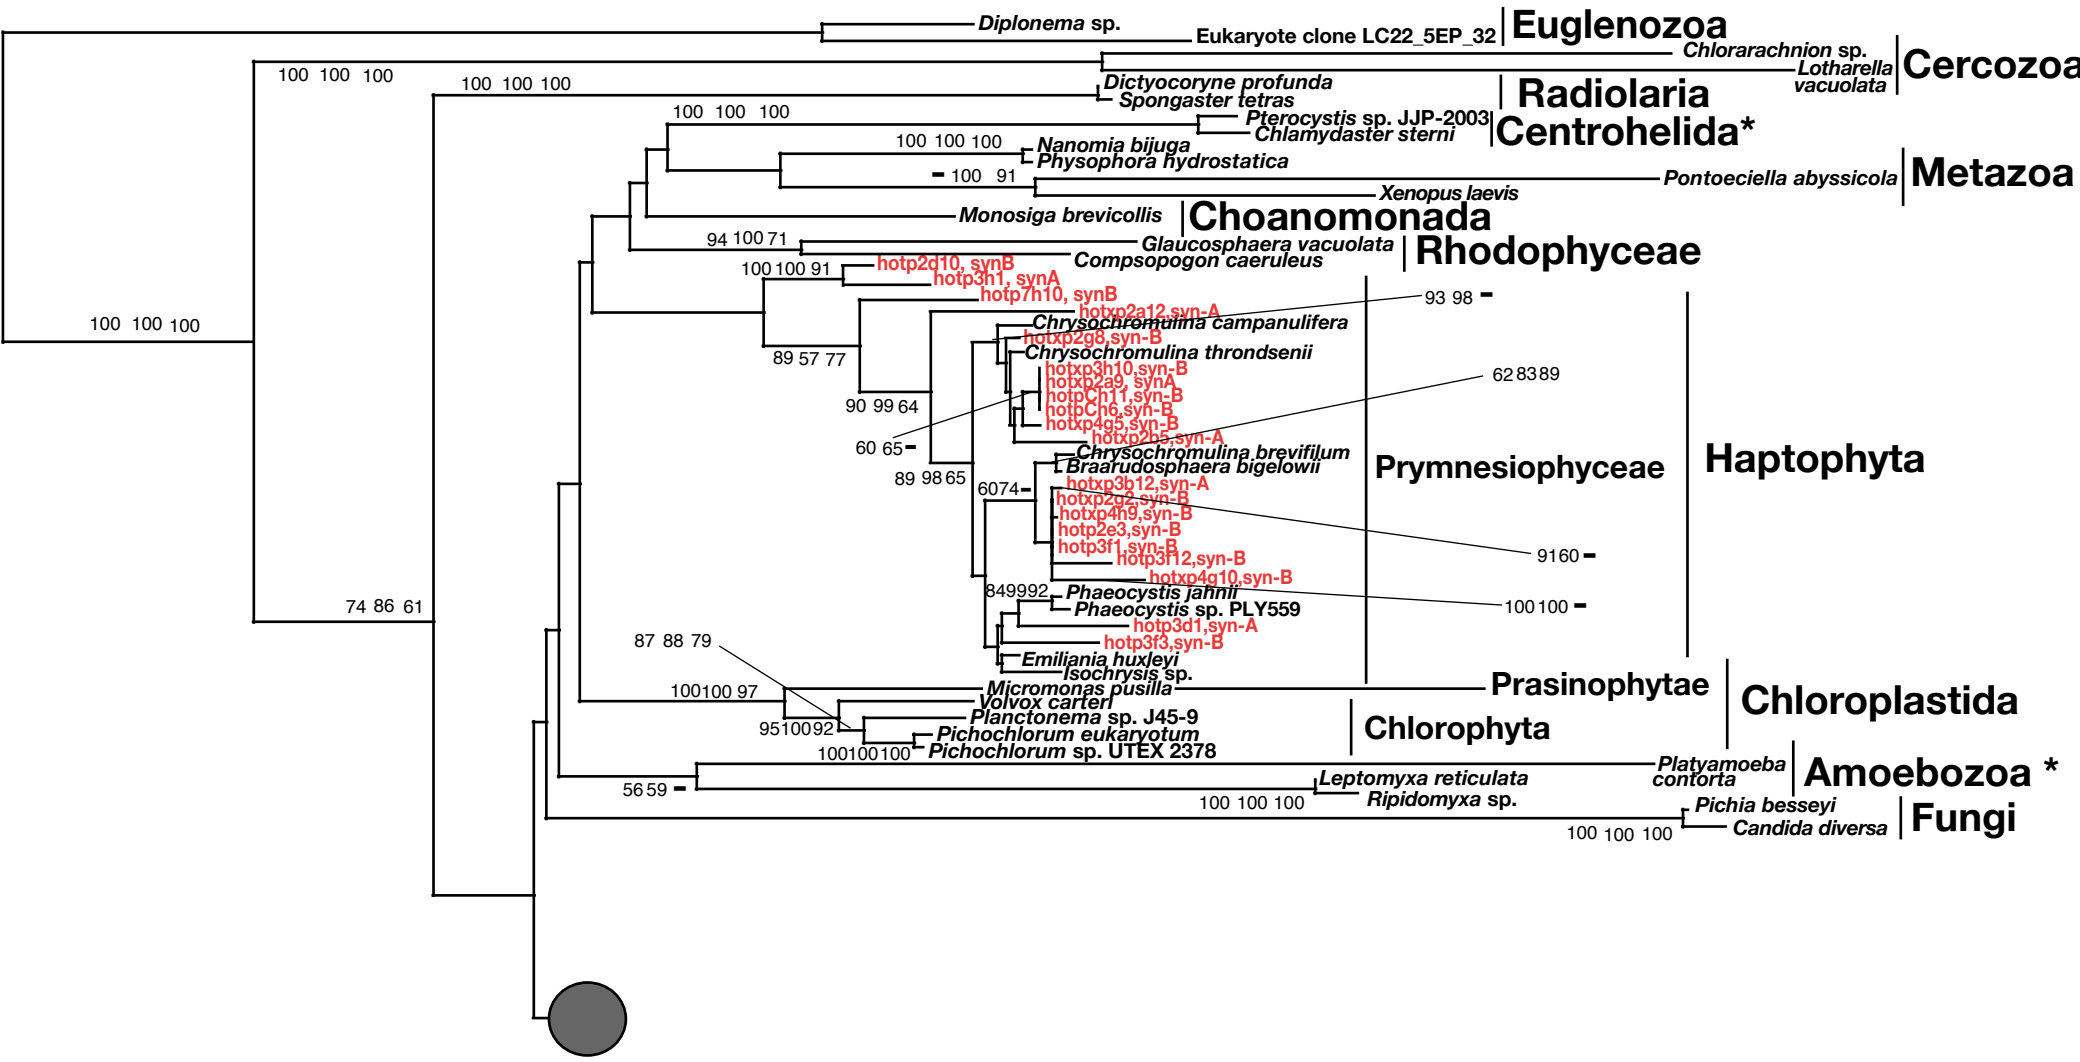

Figure S4 (Cont. next page)

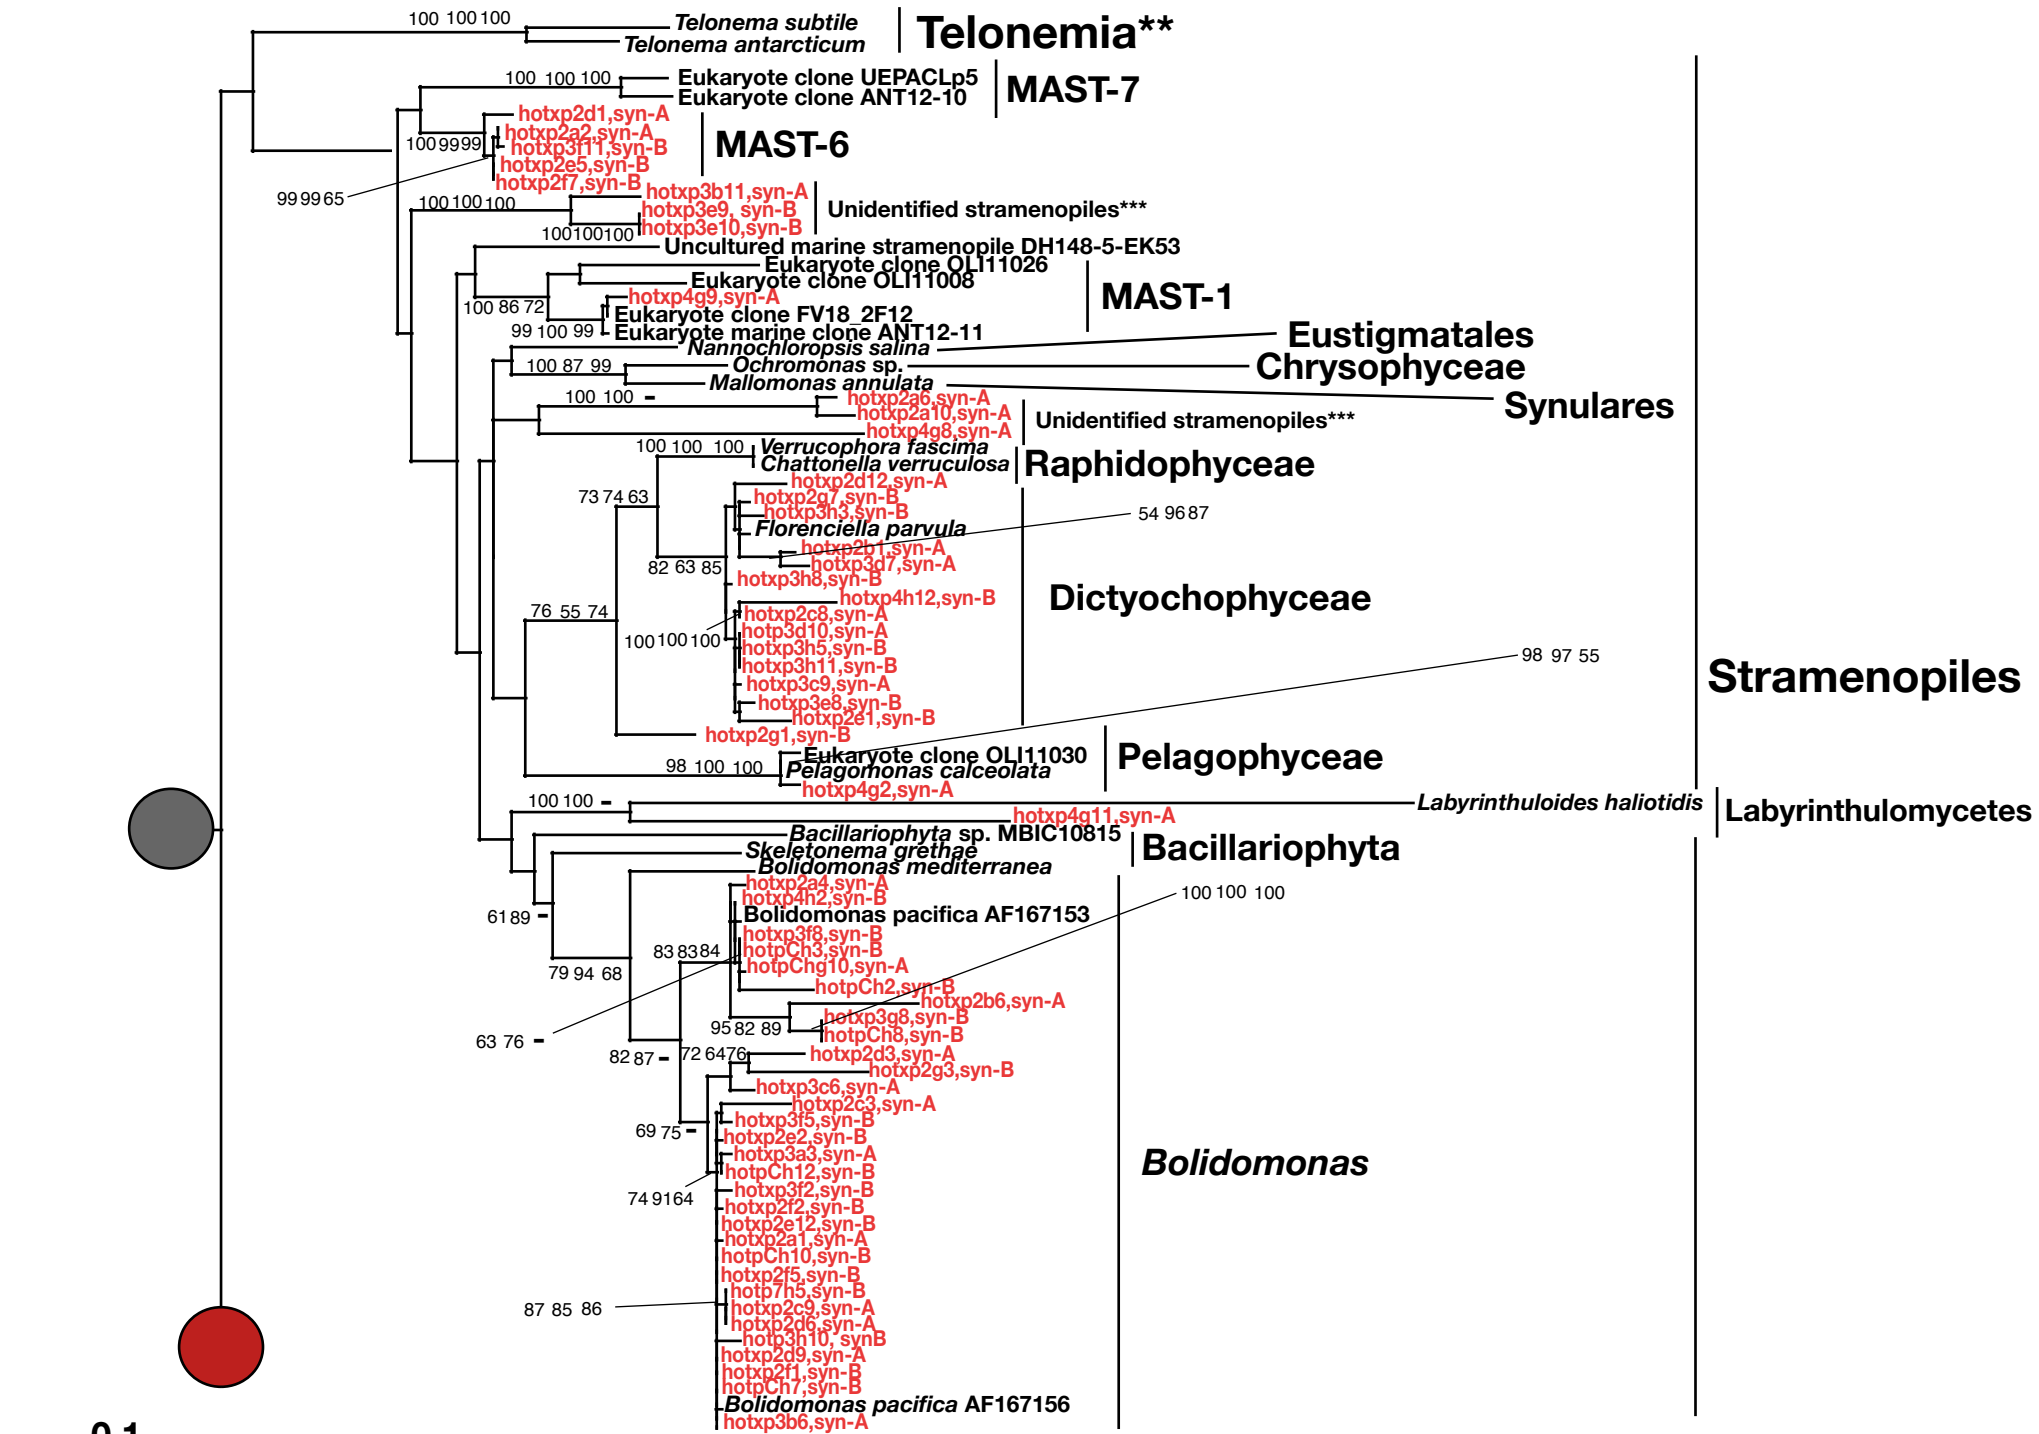

Figure S4 (Cont. next page)

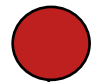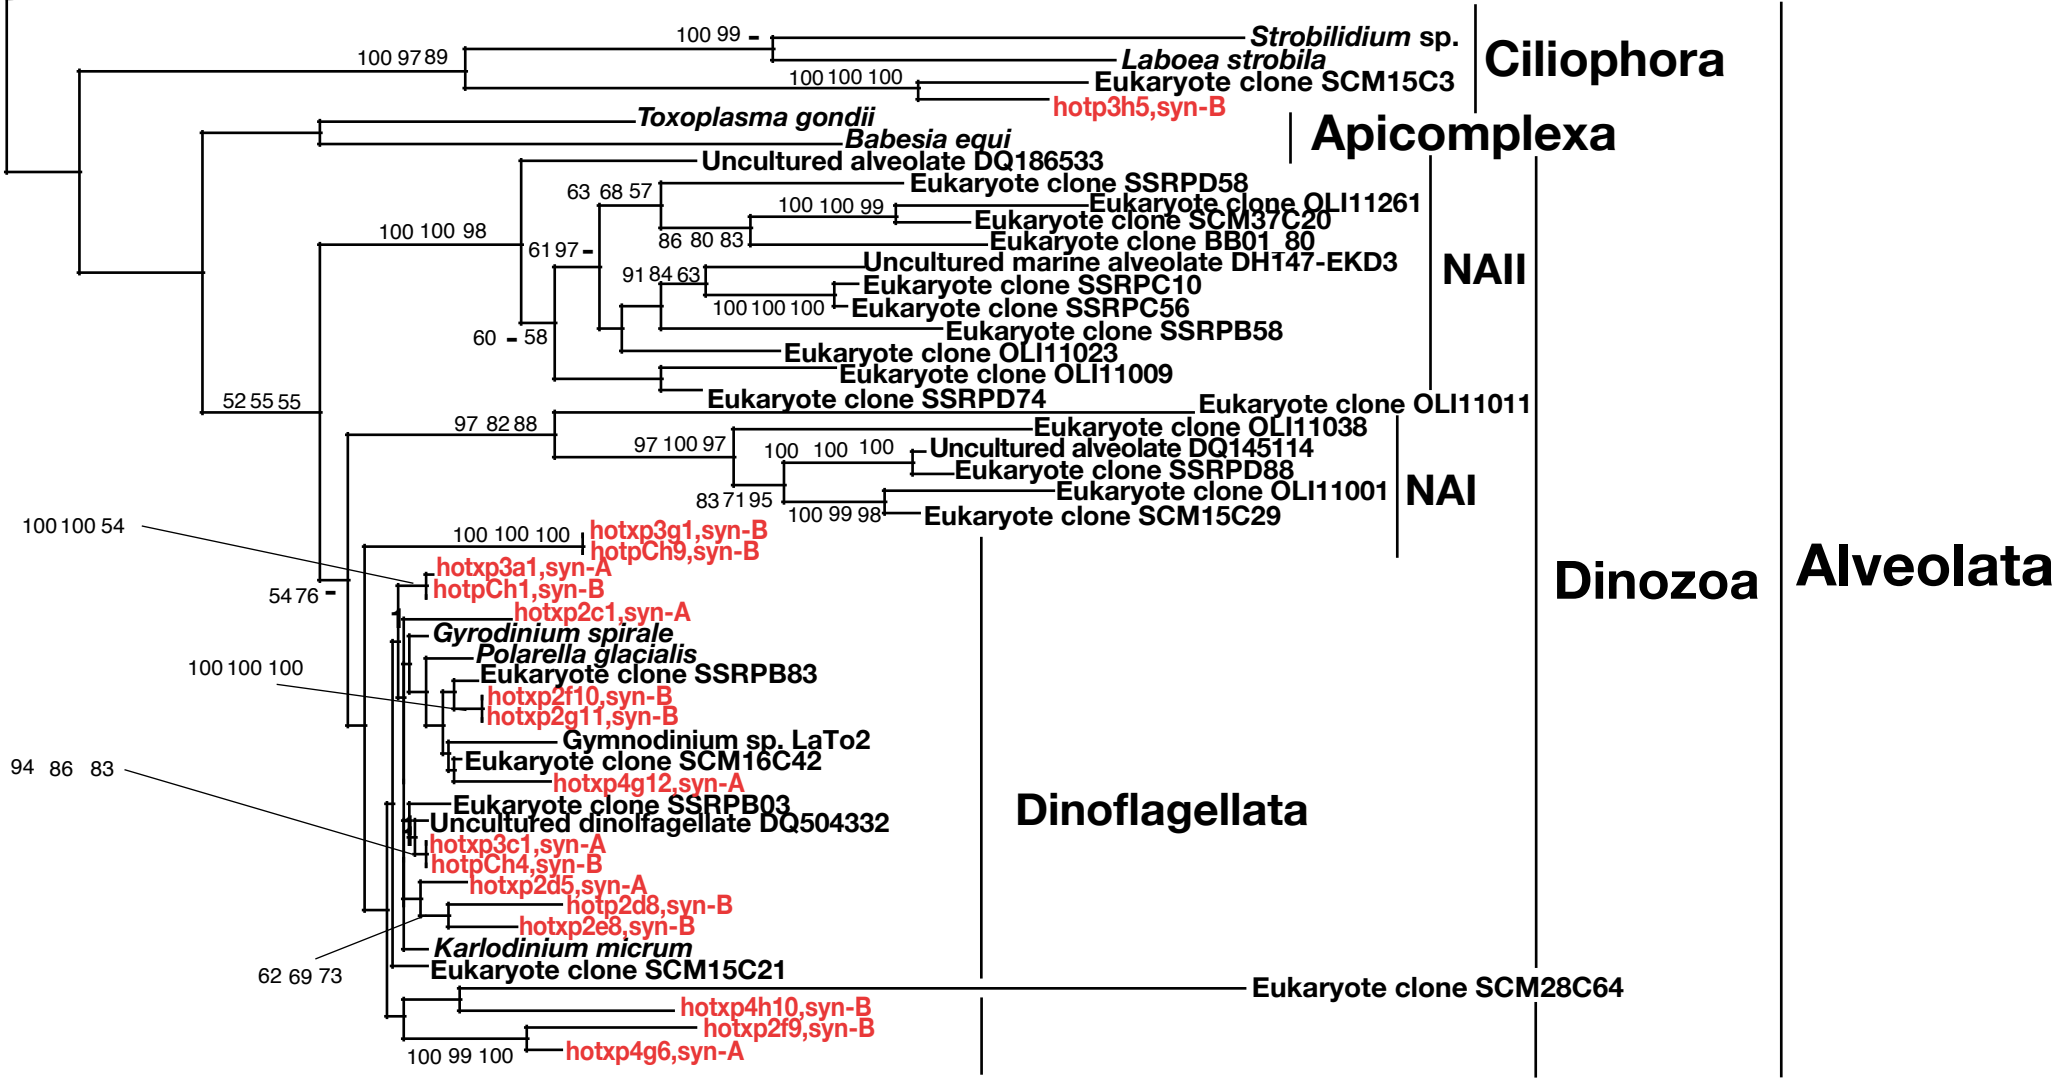

0.1

Figure S4

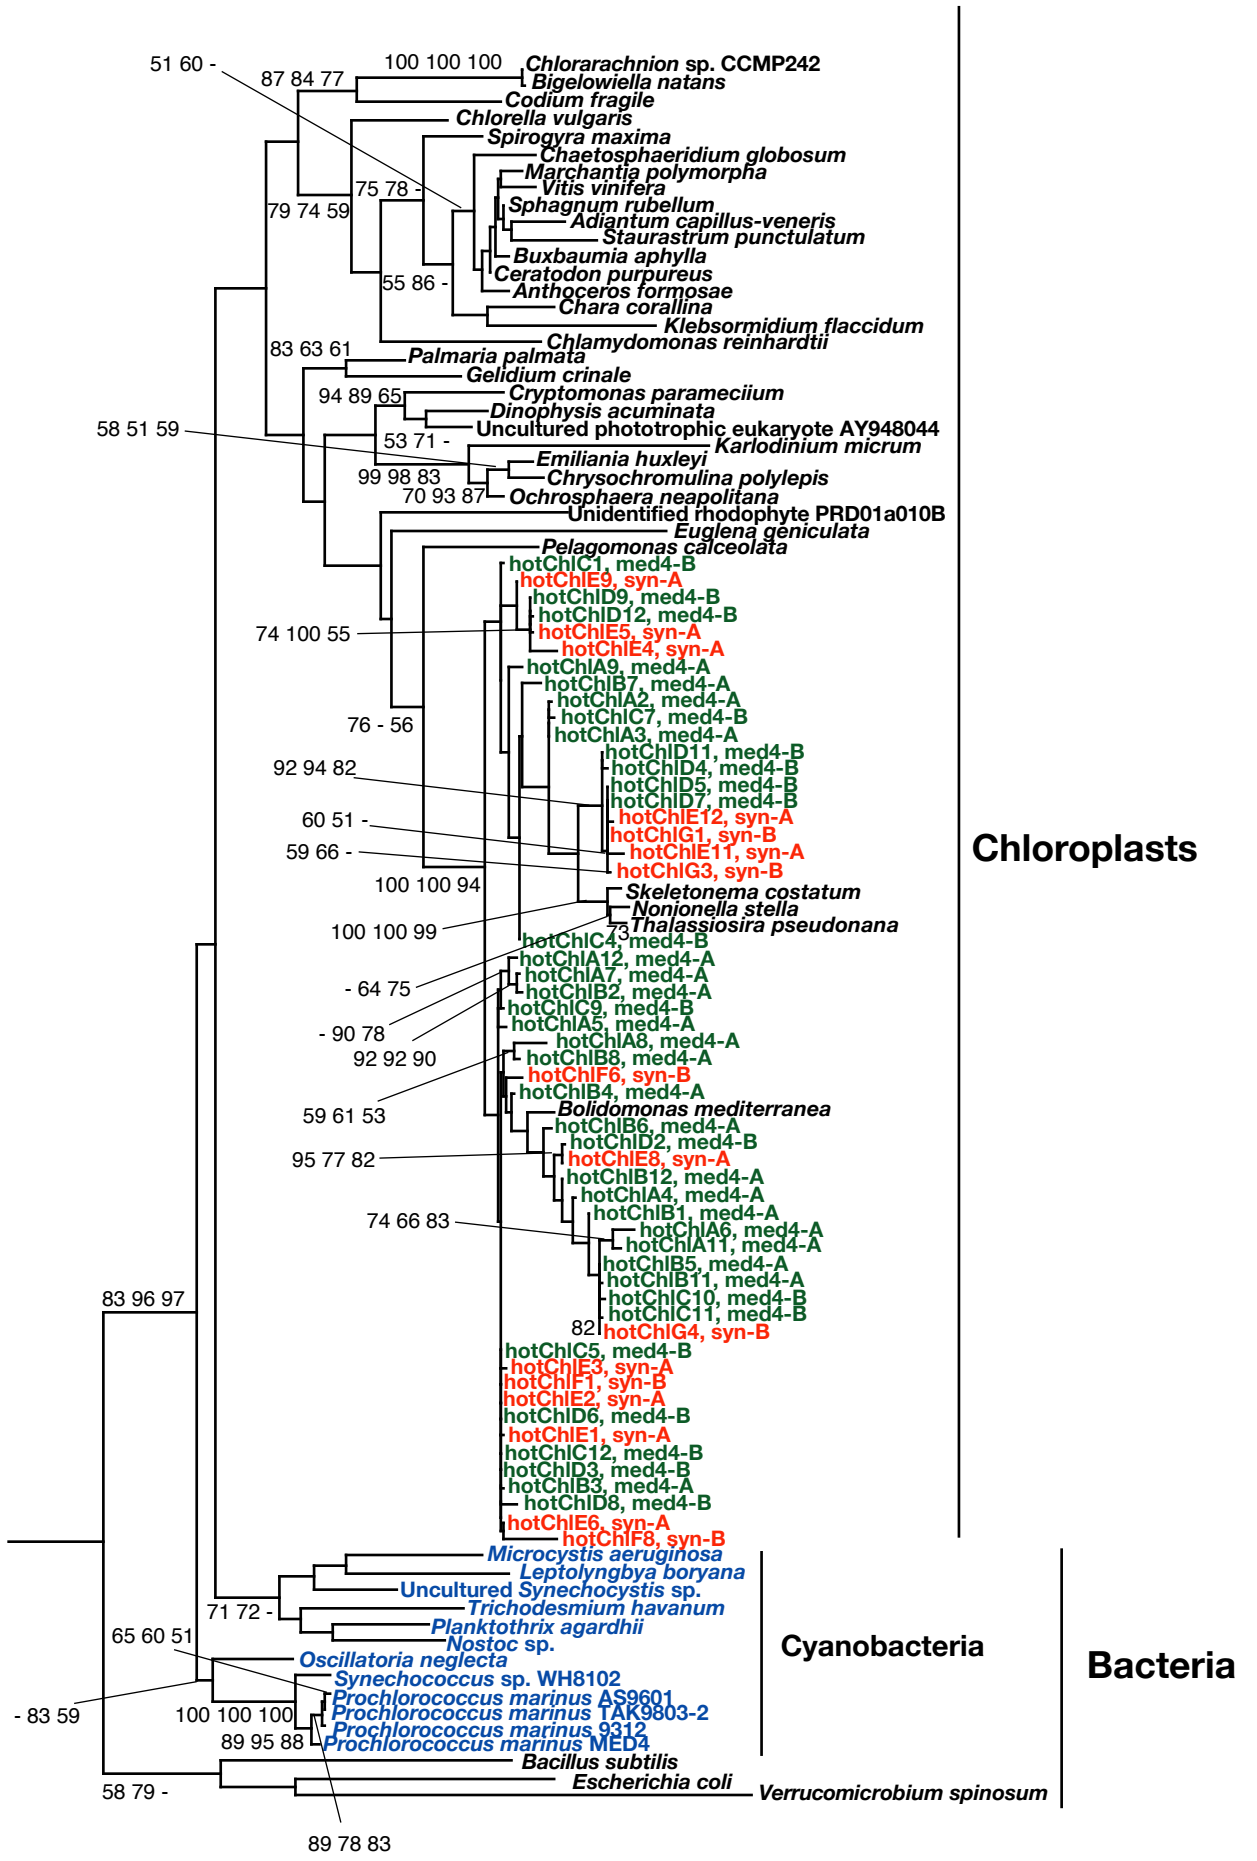

Figure S5
